# Supplementary material
Source: Royal Society of Chemistry journal article supplement (doi:10.1039/d6mh00372a)
Supplement: d6mh00372a1.pdf [file d6mh00372a1.pdf]

## Supplementary Information

# A Multifunctional Self-Healing Binder with Strong Interfacial Interactions and Structural Stability for High-Energy-Density Silicon Anodes

Haeyoung Lee<sup>a†</sup>, Jeongmin Lee<sup>a†</sup>, Jaewon Lee<sup>a\*</sup>, Woo-Jin Song<sup>a,b,c,\*</sup>

<sup>a</sup> Department of Chemical Engineering and Applied Chemistry, College of Engineering, Chungnam National University, 99 Daehak-ro (st), Yuseong-gu, Daejeon 34134, Republic of Korea

<sup>b</sup> Department of Organic Materials Engineering, College of Engineering, Chungnam National University, 99 Daehak-ro (st), Yuseong-gu, Daejeon 34134, Republic of Korea

<sup>c</sup> Institute of Carbon Fusion Technology (InCFT), Chungnam National University, Daejeon, 34134, Republic of Korea

\* Corresponding authors.

*E-mail addresses:* [jaewonlee@cnu.ac.kr](mailto:jaewonlee@cnu.ac.kr) (Jaewon Lee), [wjsong@cnu.ac.kr](mailto:wjsong@cnu.ac.kr) (W.-J. Song)

†These authors contributed equally to this work.

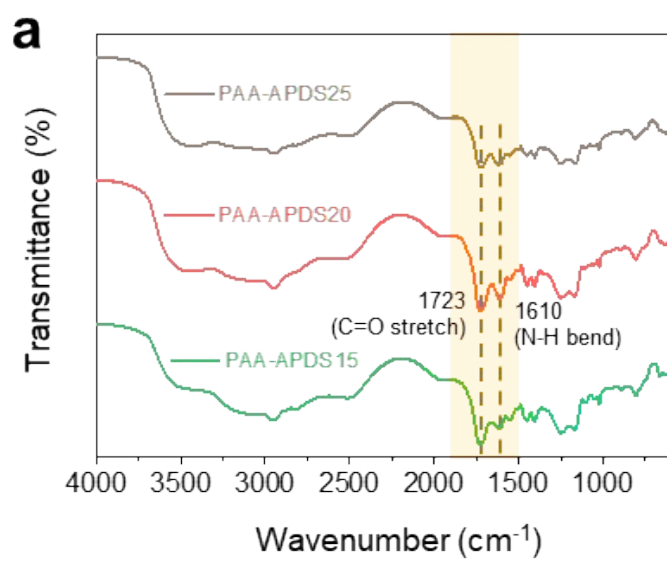

**Fig. S1.** FT-IR spectra of PAA-APDS15, PAA-APDS20 and PAA-APDS25.

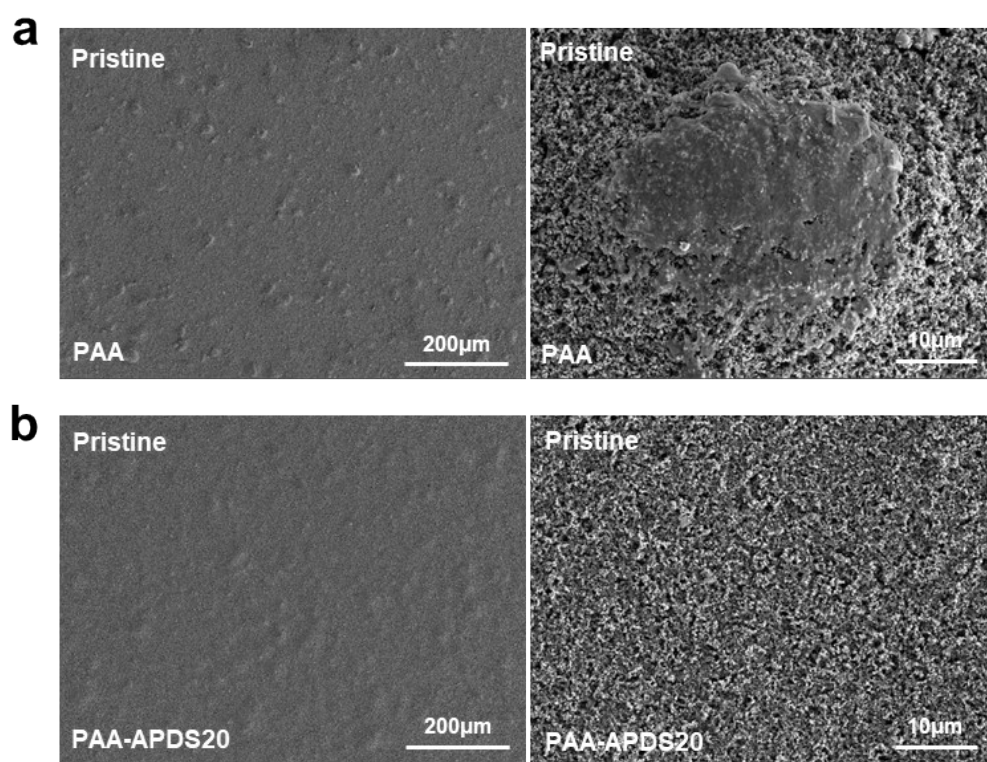

**Fig. S2.** SEM image of pristine Si electrode surfaces (a) Si/PAA (b) Si/PAA-APDS20.

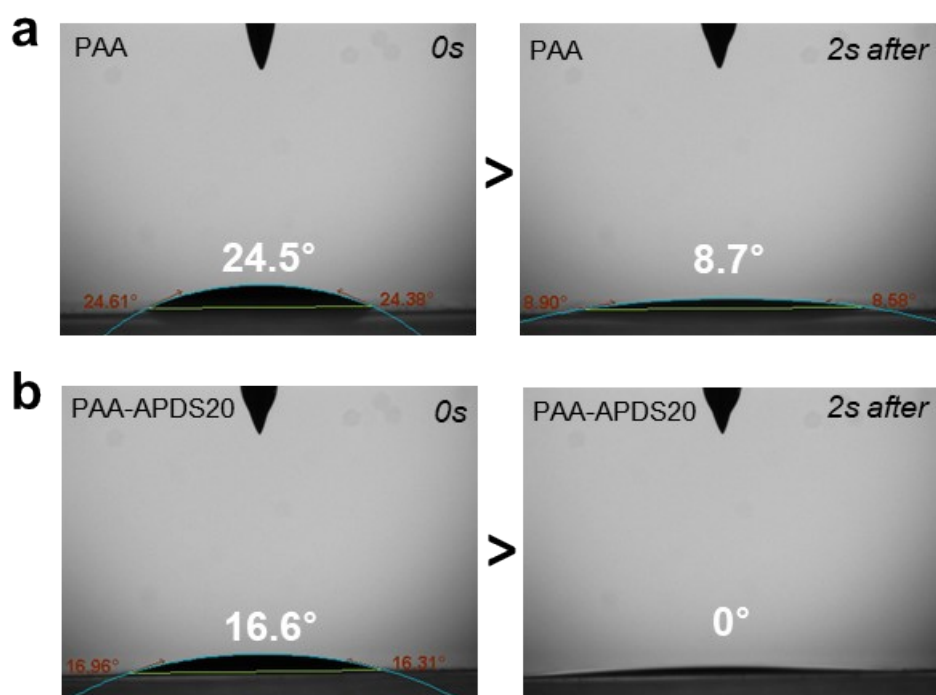

**Fig. S3.** The contact angles of the Liquid electrolyte with (a) Si/PAA and (b) Si/PAA-APDS20.

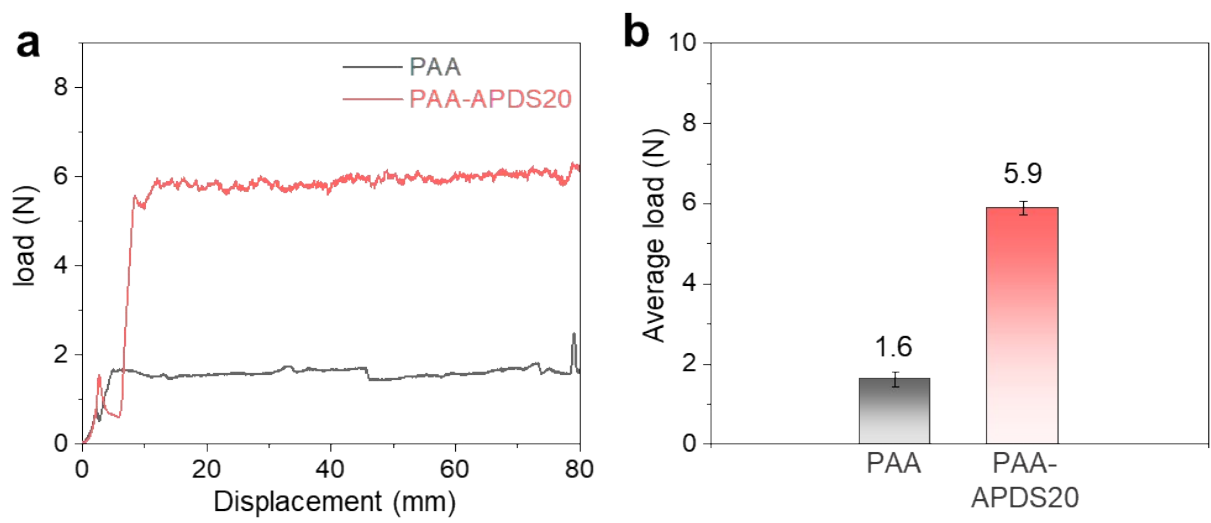

**Fig. S4.** (a) cross-cut adhesion test of Si electrodes with PAA and PAA-APDS20 binder through 180° peel off test (b) The average graph of peeling strength.

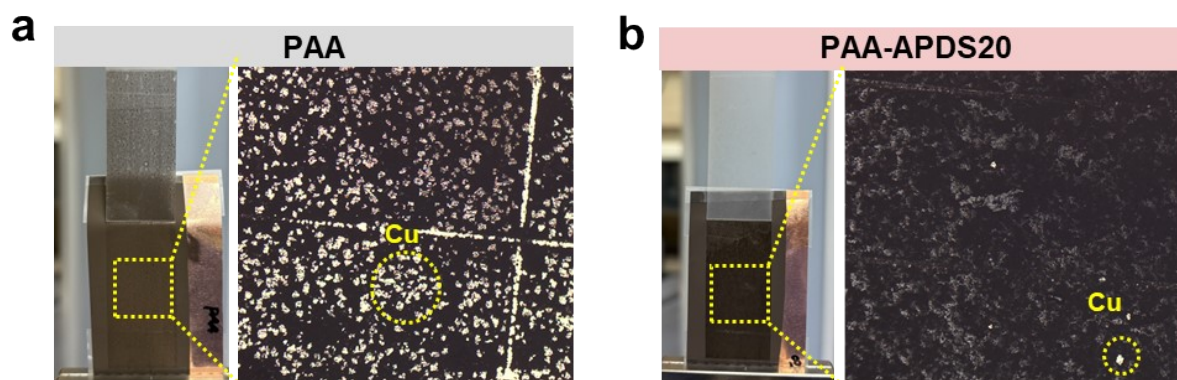

**Fig. S5.** (a) Photo and optical image of Si electrode with PAA and (b) PAA-APDS20 after cross-cut adhesion test.

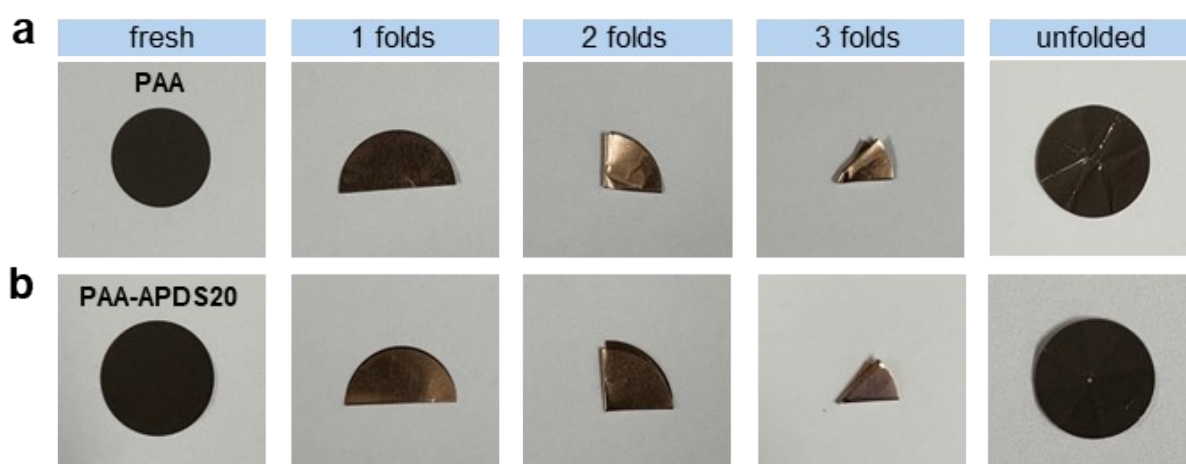

**Fig. S6.** Folding test of (a) Si electrode with PAA, (b) Si electrode with PAA-APDS20.

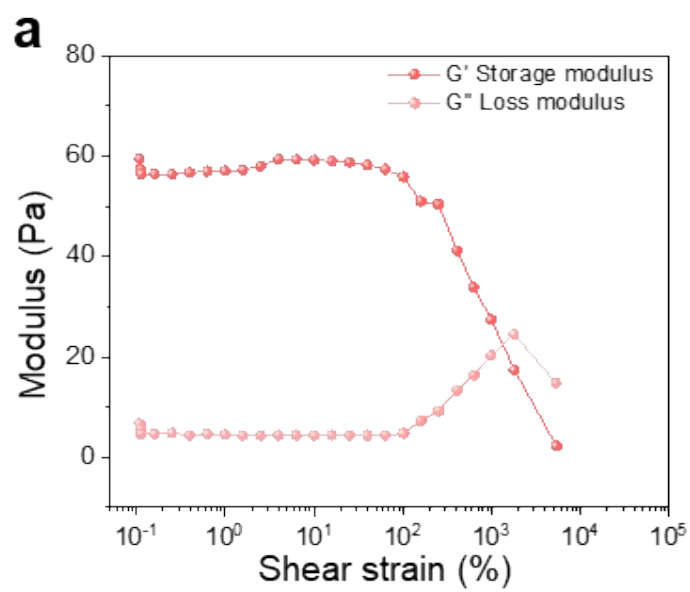

**Fig. S7.** Rheological characterization of the PAA-APDS20 binder hydrogel by amplitude sweep measurements.

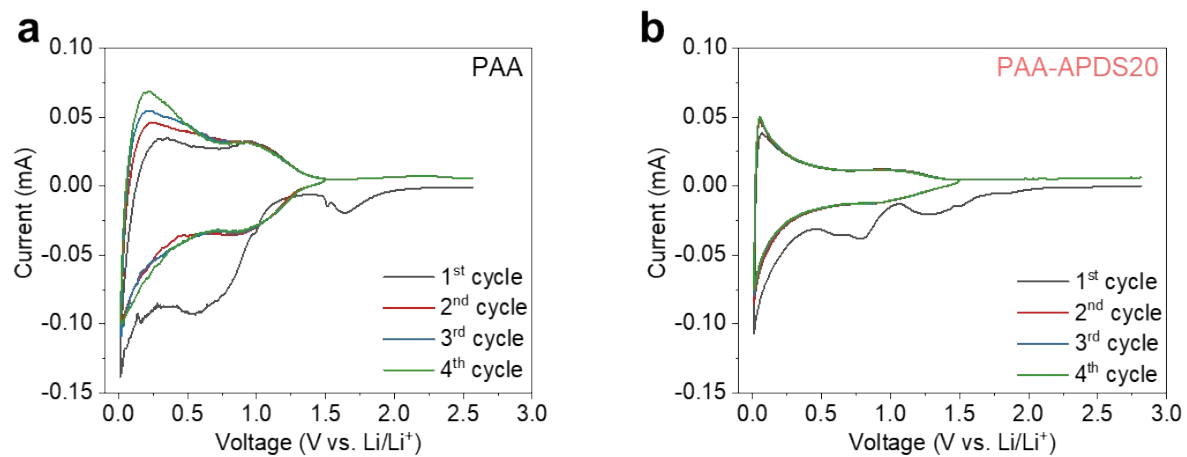

**Fig. S8.** Cyclic voltammetry (CV) curves of electrodes composed of binder and Super P at a mass ratio of 1:1, measured at a scan rate of 0.1 mV s<sup>-1</sup>: (a) PAA binder and (b) PAA-APDS20 binder.

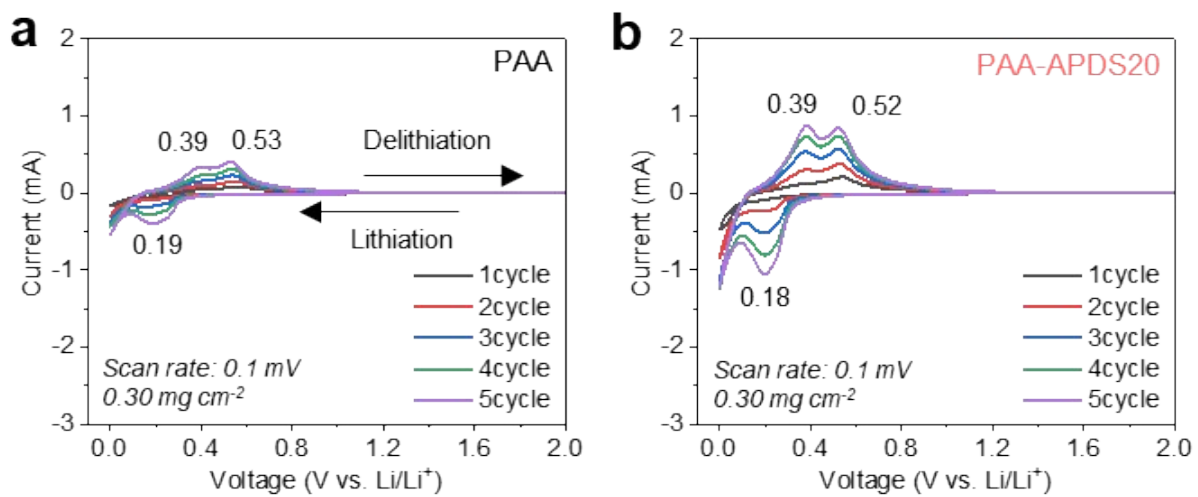

**Fig. S9.** CV curves of Si anode half-cell (a) with the Si/PAA and (b) Si/PAA-APDS20 binders.

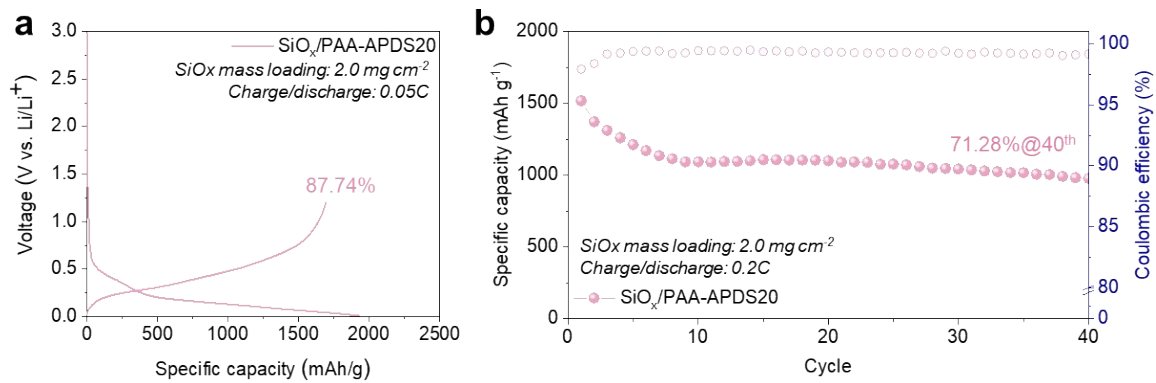

**Fig. S10.** Electrochemical performance of SiO<sub>x</sub> anode in high-mass-loading half-cell. (a) Initial voltage profiles of Si anodes with PAA-APDS20 binder. (b) Cycle performance and Coulombic efficiency.

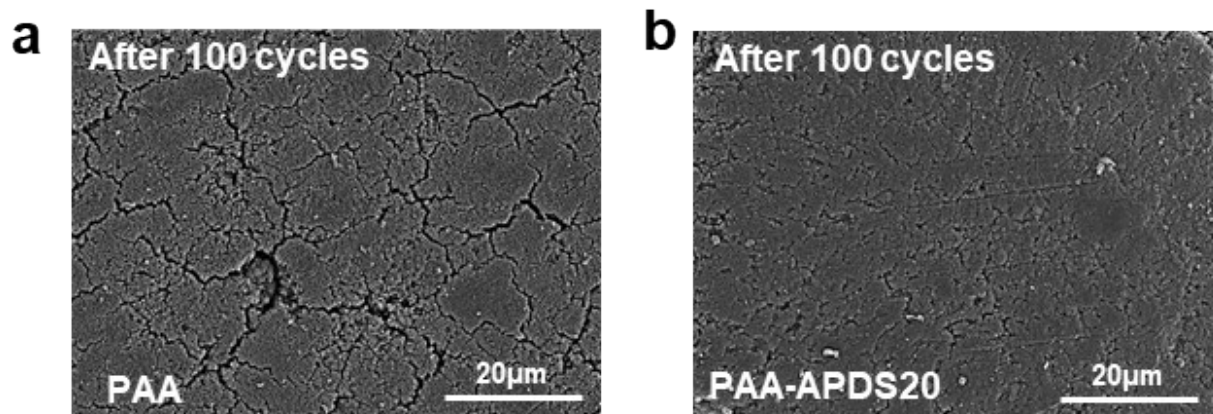

**Fig. S11.** SEM image of Si anode surfaces after 100 cycles; (a) Si/PAA (b) Si/PAA-APDS20.

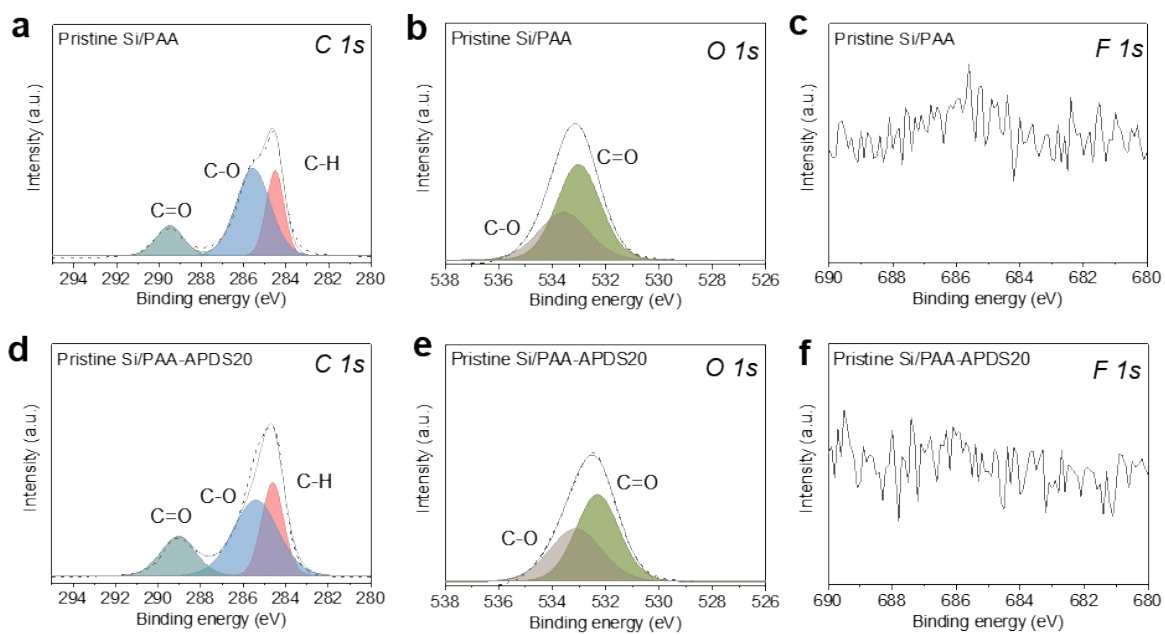

**Fig. S12.** XPS spectra of C 1s, O 1s, F 1s ; (a-c) spectra of Si/PAA before cycles. (d-f) Si/PAA-APDS20 before cycles.

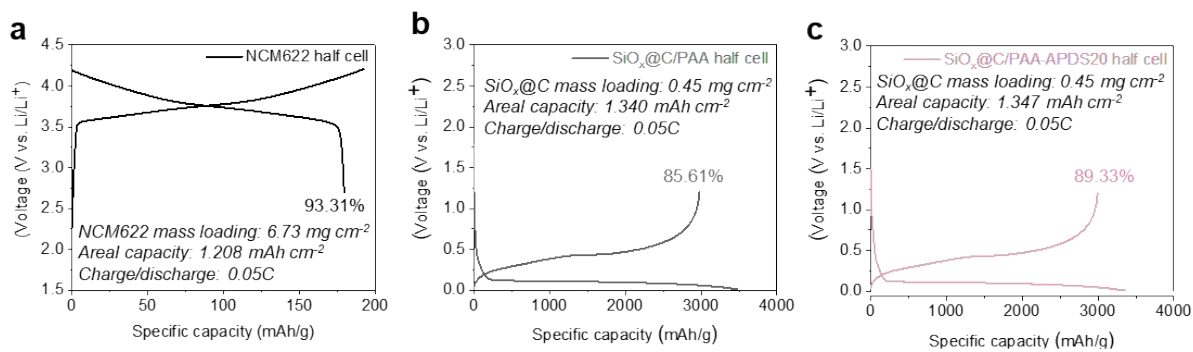

**Fig. S13.** Initial voltage profiles of half cells (a) NCM622 cathode (b) SiO<sub>x</sub>@C/PAA anode (c) SiO<sub>x</sub>@C/PAA-APDS20 anode.

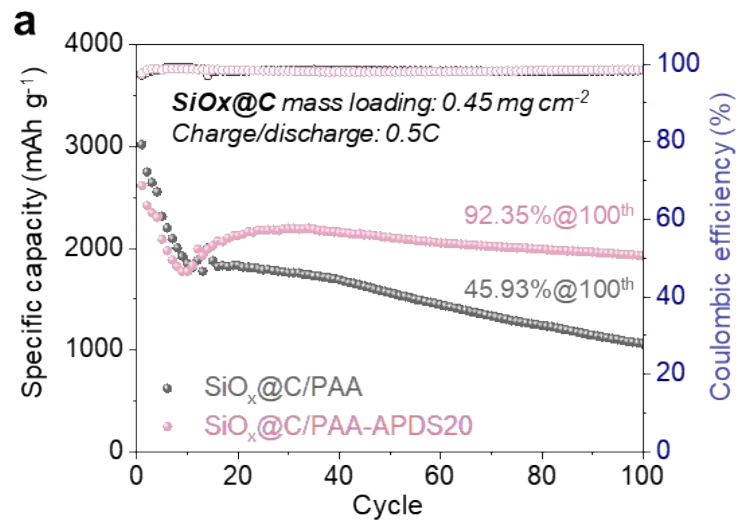

**Fig. S14.** (a) Cycle performance and Coulombic efficiency of SiO<sub>x</sub>@C/PAA and SiO<sub>x</sub>@C/PAA-APDS20 anode half cells.

| Sample      | C     | H    | N    | O     | Crosslink density(%) <sup>a</sup> |
|-------------|-------|------|------|-------|-----------------------------------|
| PAA         | 47.56 | 5.73 | 0.08 | 48.48 | -                                 |
| PAA-APDS-15 | 48.99 | 7.21 | 5.37 | 31.73 | 16.20                             |
| PAA-APDS-20 | 50.54 | 7.15 | 6.10 | 25.78 | 21.28                             |
| PAA-APDS-25 | 51.45 | 7.55 | 6.90 | 20.57 | 27.69                             |

$$^a \text{Crosslink density} = \frac{n_{\text{crosslinker}}}{(n_{\text{PAA}} + n_{\text{crosslinker}})}$$

**Table S1.** Elemental composition (C, H, N, and O) and calculated crosslink density of PAA and PAA-APDS binders with different APDS feed ratios.

| Resistance             | After 1 cycle |            | After 100 cycles |            |
|------------------------|---------------|------------|------------------|------------|
|                        | PAA           | PAA-APDS20 | PAA              | PAA-APDS20 |
| $R_s$ ( $\Omega$ )     | 2.79          | 2.52       | 5.227            | 3.55       |
| $R_{SEI}$ ( $\Omega$ ) | 11.36         | 5.78       | 30.99            | 16.99      |
| $R_{ct}$ ( $\Omega$ )  | 31.75         | 19.04      | 31.33            | 20.74      |

**Table S2.** EIS measurements of Si anode (a) with PAA binder and (b) PAA-APDS20 binder.
